# Supplementary material for: A ratiometric fluorescence sensor based on enzymatically activatable micellization of TPE derivatives for quantitative detection of alkaline phosphatase activity in serum
Source: Royal Society of Chemistry journal article supplement (doi:10.1039/d0ra03584j), 2020-01-01

## Supplementary Information

For

A ratiometric fluorescence sensor based on enzymatically activatable  
micellization of TPE derivatives for quantitative detection of alkaline phosphatase  
activity in serum

Jeongmoo Lee, Seoyun Kim, Tae Hoon Kim, and Seoung Ho Lee\*

*Department of Chemistry, Daegu University, Gyeongsan, 38453, Republic of Korea*

*Institute of Natural Sciences, Daegu University, Gyeongsan, 38453, Republic of Korea*

*Department of Food Science and Biotechnology, Daegu University, Gyeongsan 38453, Republic  
of Korea*

Experimental -----page S2

Fig. S1 -----page S3

Fig. S2 -----page S4

Fig. S3 -----page S5

Fig. S4 -----page S6

Fig. S5 -----page S7

Fig. S6 -----page S8

Fig. S7 -----page S9

Table S1 -----page S10

Appendix -----page S11

## Synthesis of Compound 1

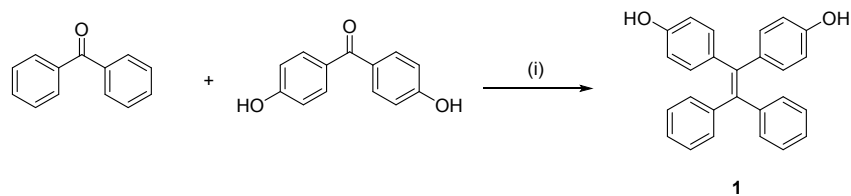

Scheme S1. Synthesis of **1**

**Synthesis of compound 1.** Benzophenone (3.1 g, 16.8 mmol) and bis(4-hydroxyphenyl)methanone (3.0 g, 14.0 mmol) were dissolved in 150 mL of THF. The resulting solution was deoxygenated with argon for 15 minutes. Then  $\text{TiCl}_4$  (13.3 g, 70.0 mmol) and zinc powder (9.2 g, 140.0 mmol) were added to the stirred solution under the protection of argon. The reaction mixture was then heated up to 60 ~ 65 °C and stirred for 24 hours. The excess zinc residue was removed by flash chromatography using THF as solvent and the filtrate was concentrated under reduced pressure. The crude mixture was purified by column chromatography on silica gel using ethyl acetate:hexane (1:2) as the eluent. Yield: 64%;  $^1\text{H}$  NMR (500 MHz,  $\text{CDCl}_3$ ):  $\delta$  7.07-6.98 (m, 10H), 6.79 (d, 4H,  $J = 8.65$  Hz), 6.46 (d, 4H,  $J = 8.7$  Hz);  $^{13}\text{C}$  NMR (125 MHz, Tetrahydrofuran- $d_8$ ): 157.35, 145.80, 142.07, 139.01, 135.96, 133.48, 132.28, 128.36, 126.59, 115.21 ; ESI(+)-MS ( $m/z$ ):  $[\text{M}^+]$  Calcd. for  $\text{C}_{26}\text{H}_{20}\text{O}_2$ , 364.44; found, 364.44

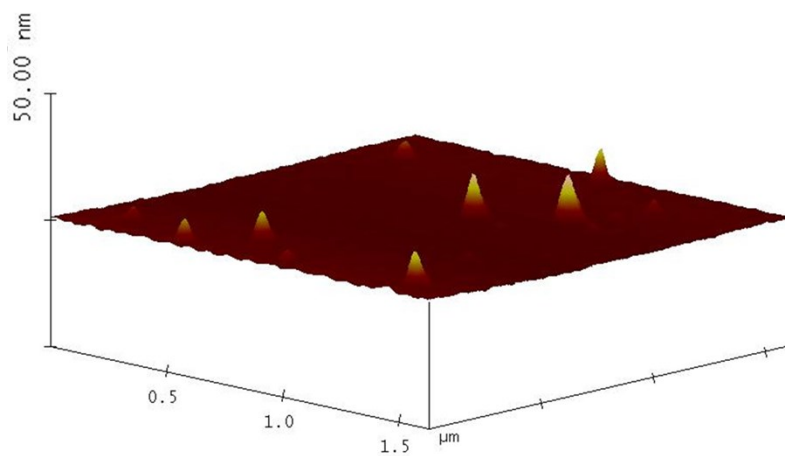

**Fig. S1** AFM image of **P-TPE-TG** ( $1.0 \times 10^{-5}$  M) on a silicon wafer incubated with ALP (100 mU/mL) for 60 minutes in aqueous solution.

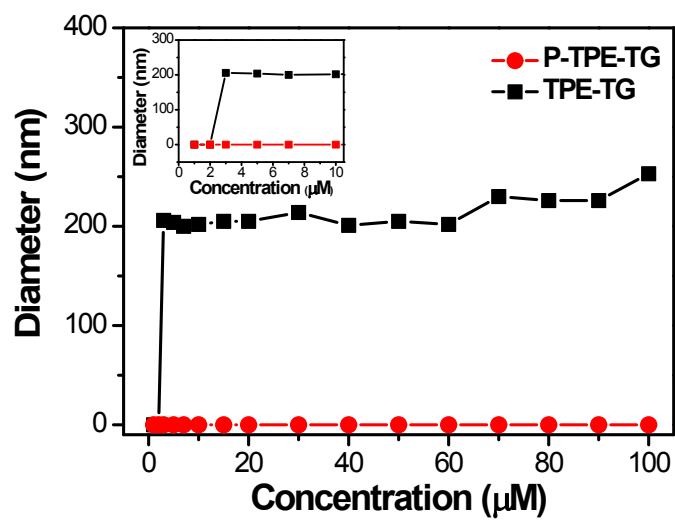

**Fig. S2** hydrodynamic radii obtained from DLS of **P-TPE-TG** and **TPE-TG** with increasing concentration (1-100  $\mu\text{M}$ ) in 10 mM Tris-HCl buffer solution, pH 7.4.

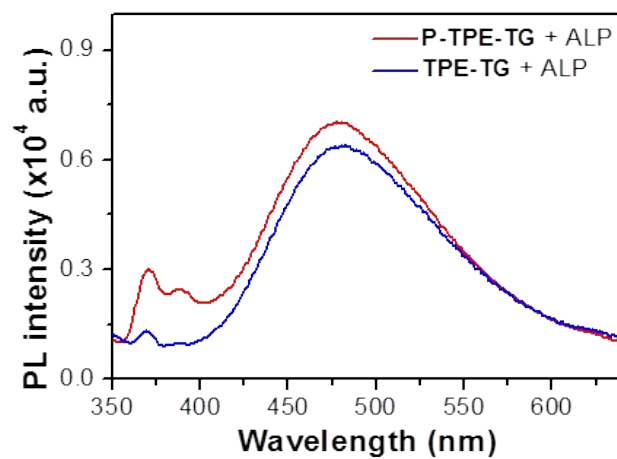

**Fig. S3** Fluorescence emission spectra of **P-TPE-TG** ( $1.0 \times 10^{-5}$  M) and **TPE-TG** ( $1.0 \times 10^{-5}$  M) incubated with ALP (100 mU/mL) for 20 minutes in 10 mM Tris-HCl buffer solution, at 37 °C, pH 7.4. Excitation at 330 nm.

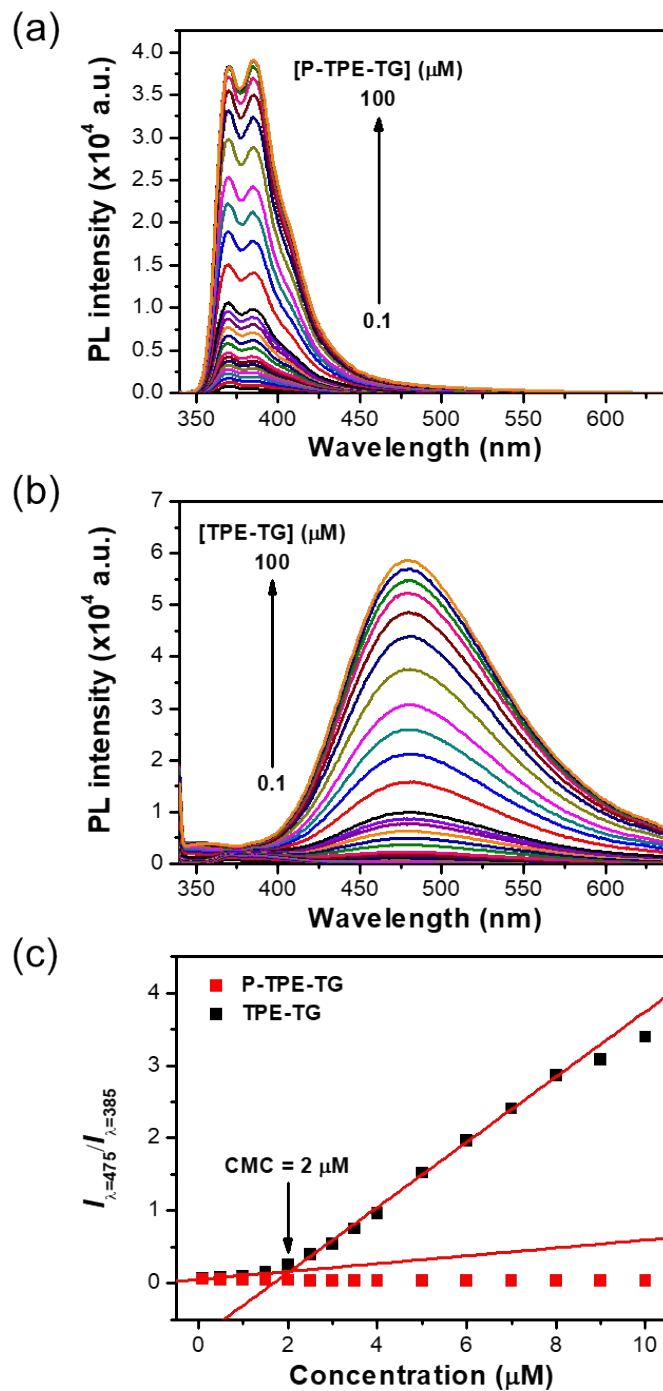

**Fig. S4** Fluorescence intensity changes of (a) **P-TPE-TG** and (b) **TPE-TG** with increasing concentration (0.1-100  $\mu\text{M}$ ) in 10 mM Tris-HCl buffer solution, pH 7.4; (c) critical micelle concentration (CMC) determined by the change in fluorescence intensity as a function of the concentration.

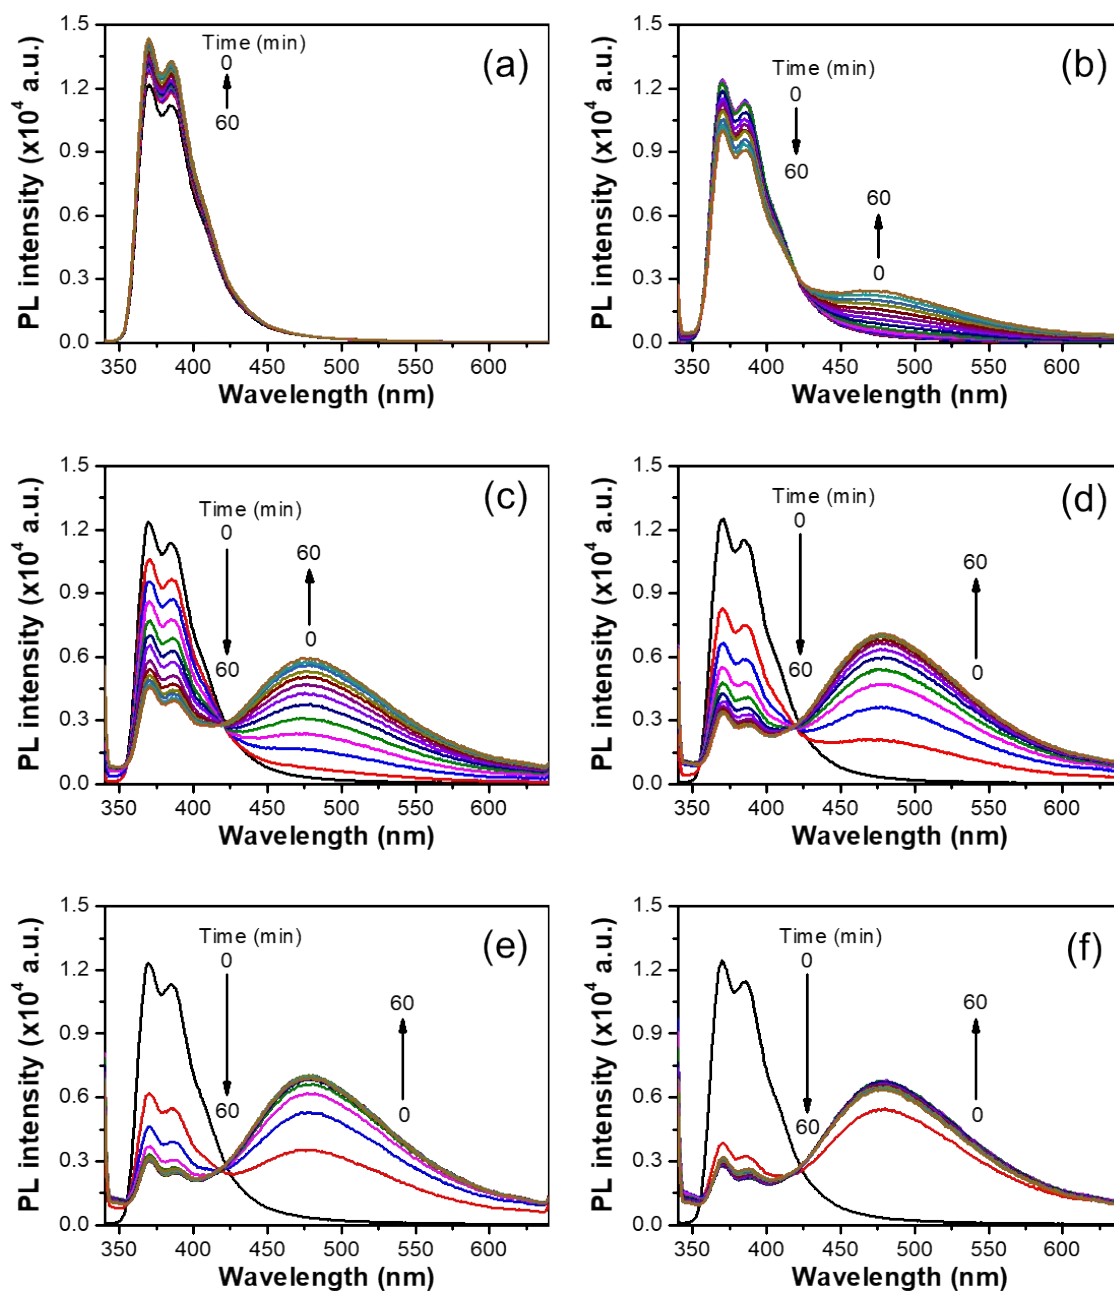

**Fig. S5.** Time-resolved fluorescence changes of **P-TPE-TG** ( $10 \times 10^{-6}$  M) incubated with various concentrations of ALP (a: 0, b: 10, c: 25, d: 50, e: 100 and f: 200 mU/mL) at 37 °C in 10 mM Tris-HCl buffer solution, pH 7.4 for 60 min. Excitation at 330 nm.

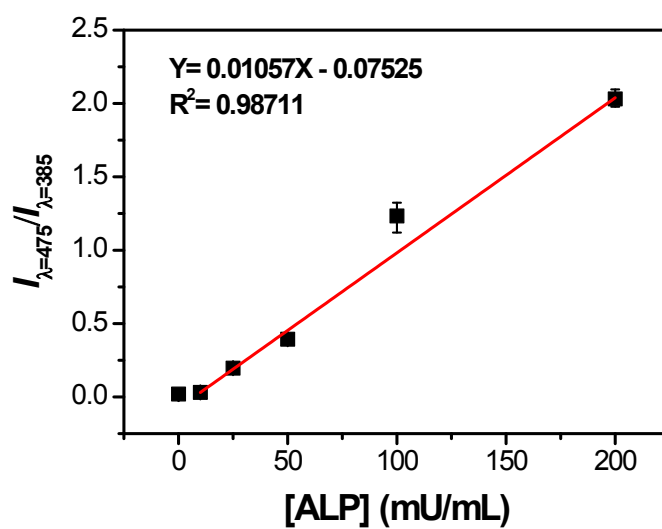

**Fig. S6.** Titration profile of **P-TPE-TG** ( $1.0 \times 10^{-5}$  M) incubated with various concentrations of ALP for 10 min in 10 mM Tris-HCl buffer solution at 37 °C, pH 7.4. Excitation at 330 nm.

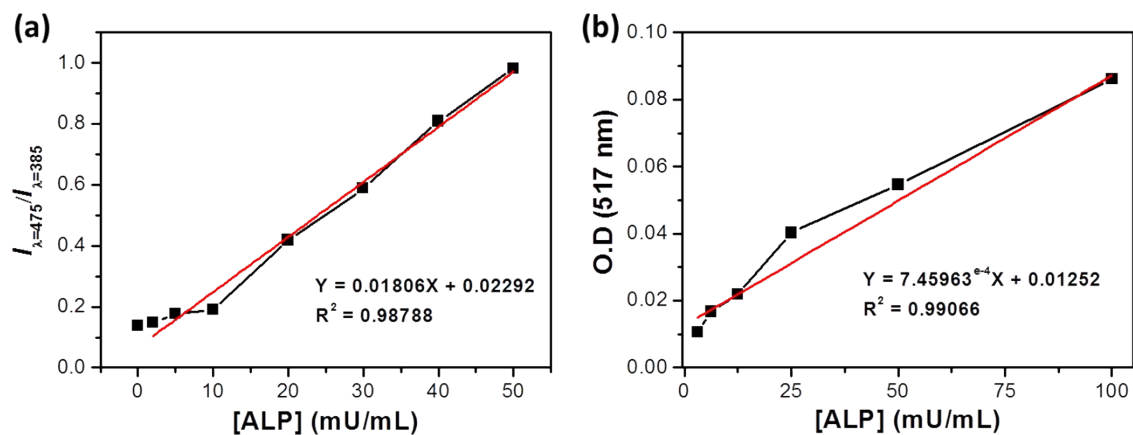

**Fig. S7** Titration profiles and calibration plots of (a) **P-TPE-TG** ( $1.0 \times 10^{-5}$  M) incubated with various concentrations of ALP for 60 min in diluted serum (10%) at 37 °C, pH 7.4 and (b) **DPP** incubated with various concentrations of ALP for 15 min in diluted serum (1.25%).

**Table S1.** Specification for normal human serum that was purchased from Sigma-Aldrich chemical company. Data was collected from Sigma-Aldrich chemical company sample information.

| TEST                                  | Specification                      |
|---------------------------------------|------------------------------------|
| Appearance (Color)                    | Colorless to Brown-Yellow to Brown |
| Appearance (Form)                     | Liquid                             |
| pH                                    | 7.0 – 9.0                          |
| Iron (UG%)                            | 40 – 100                           |
| Source: Male donors                   | Conforms                           |
| Within the United States              |                                    |
| Processing Country of Origin          | Conforms                           |
| United States                         |                                    |
| Osmolality                            | 260 - 340                          |
| Expressed in MOSM/KG H <sub>2</sub> O |                                    |
| Sterility by USP Guidelines           | Pass                               |
| Hemoglobin                            | ≤ 25 mg/dl                         |
| Mycoplasma Test                       | None Detected                      |
| Endotoxin Level                       | ≤ 10 EU/ml                         |
| Cholesterol                           | 80 – 200 mg/dl                     |
| Triglyceride                          | 30 – 175 mg/dl                     |
| Glucose                               | 50 – 180 mg/dl                     |
| Sodium (Na)                           | 100 – 160 MEQ/L                    |
| Protein Content                       | 4.0 – 9.0 %                        |
| Tested For Infectious Agents          | Tested                             |

All donor units are collected in donor centers located in the United States, which are licensed by the FDA.

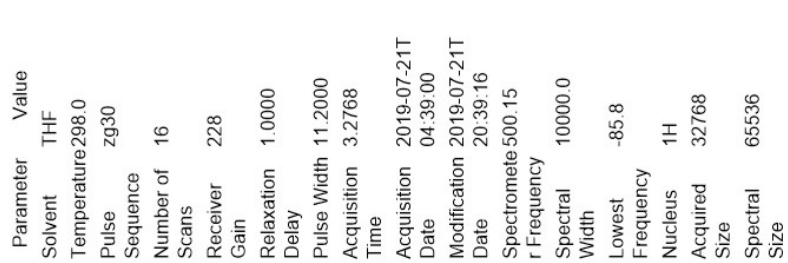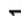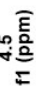



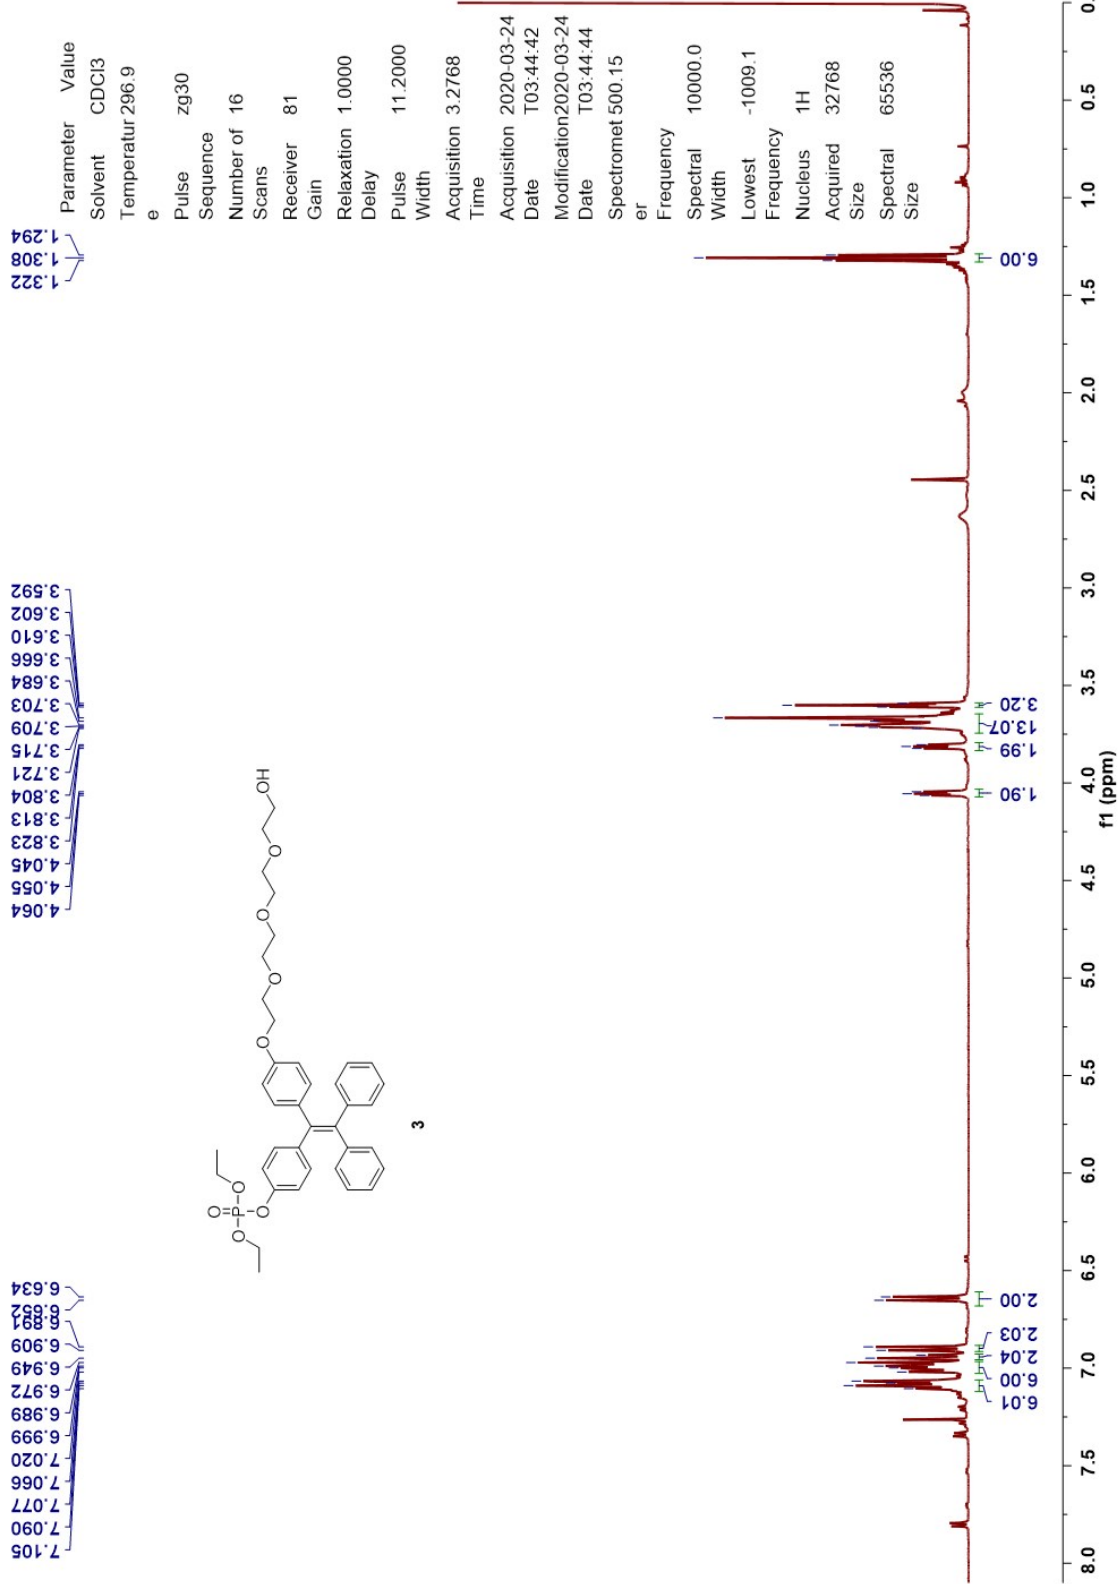

7.140  
7.127  
7.112  
7.104  
7.090  
7.068  
7.040  
7.024  
7.008  
6.995  
6.974  
6.957  
6.850  
6.833  
6.603  
6.586

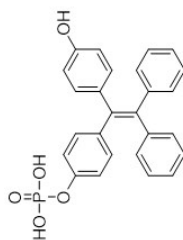

P-TPE

Parameter Value  
Solvent Acetone  
Temperature 297.0  
e  
Pulse zg30  
Sequence  
Number of 16  
Scans  
Receiver 144  
Gain  
Relaxation 1.0000  
Delay  
Pulse 11.2000  
Width  
Acquisition 3.2768  
Time  
Acquisition 2020-03-24  
Date T07:30:54  
Modification 2020-03-24  
Date T07:30:56  
Spectrometer 500.15  
er  
Frequency  
Spectral 10000.0  
Width  
Lowest -1007.5  
Frequency  
Nucleus 1H  
Acquired 32768  
Size  
Spectral 65536  
Size

6.02  
8.03  
2.00  
1.97

8.0 7.5 7.0 6.5 6.0 5.5 5.0 4.5 4.0 3.5 3.0 2.5 2.0 1.5 1.0 0.5 0.0  
f1 (ppm)

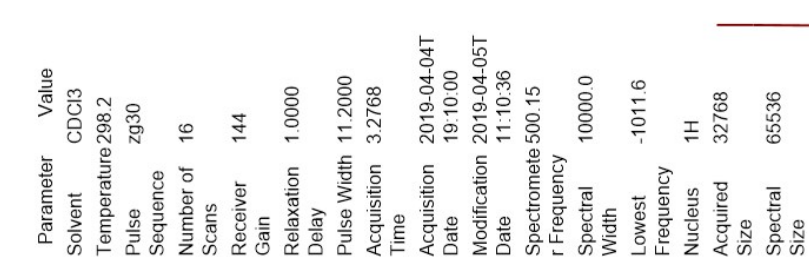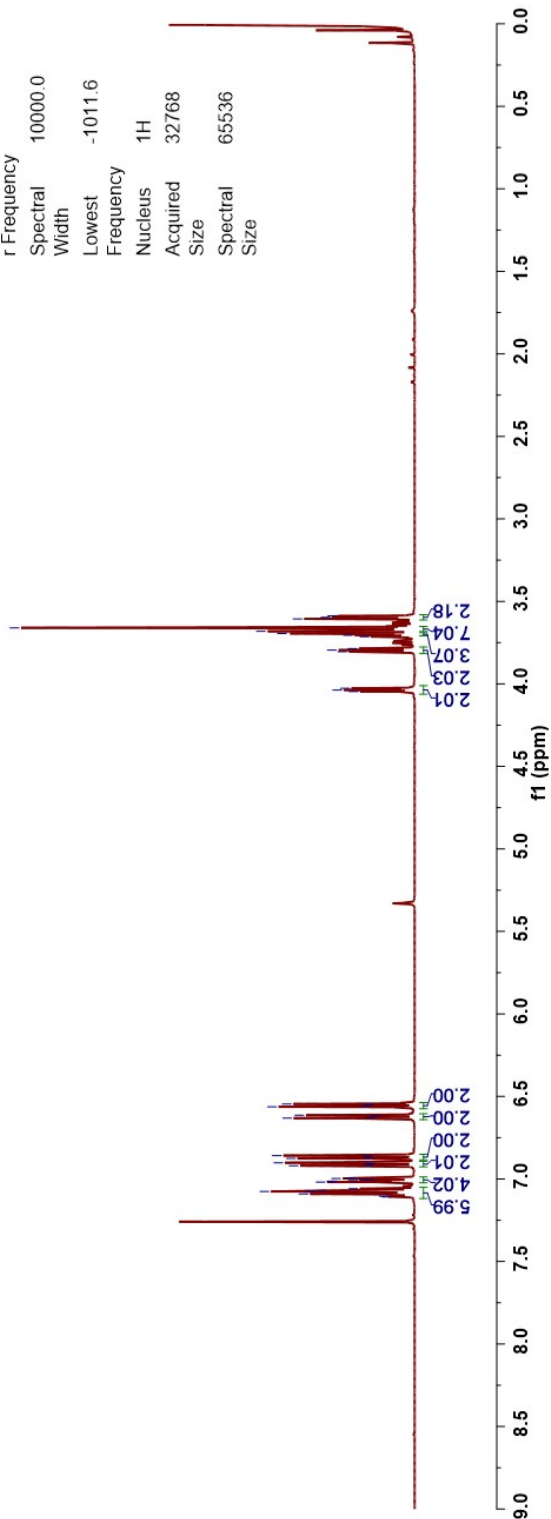

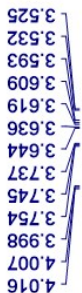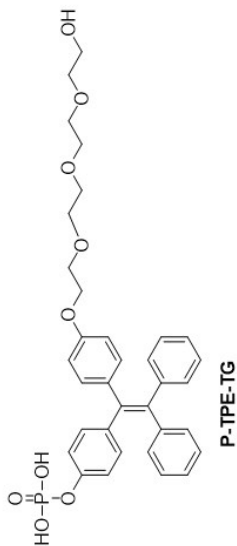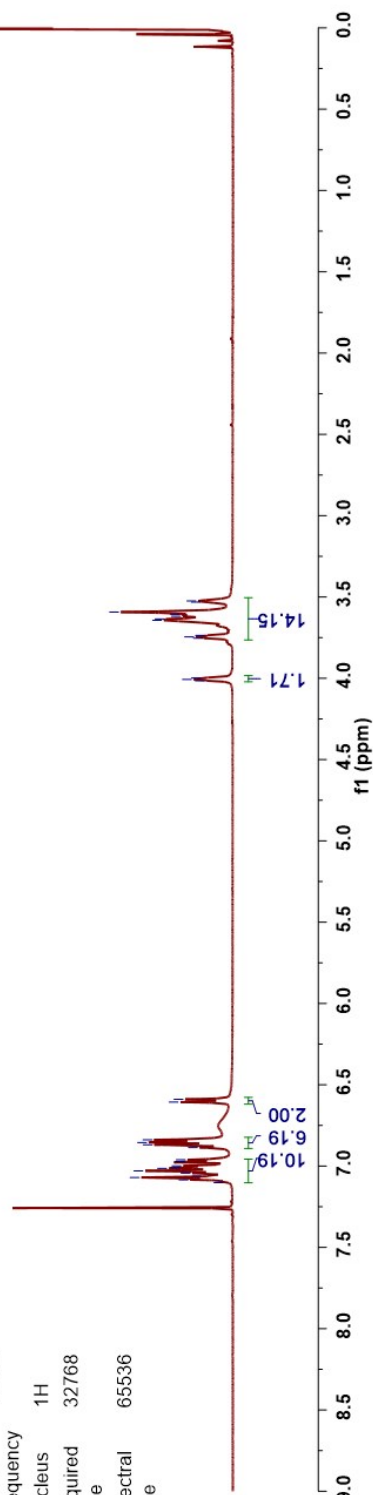

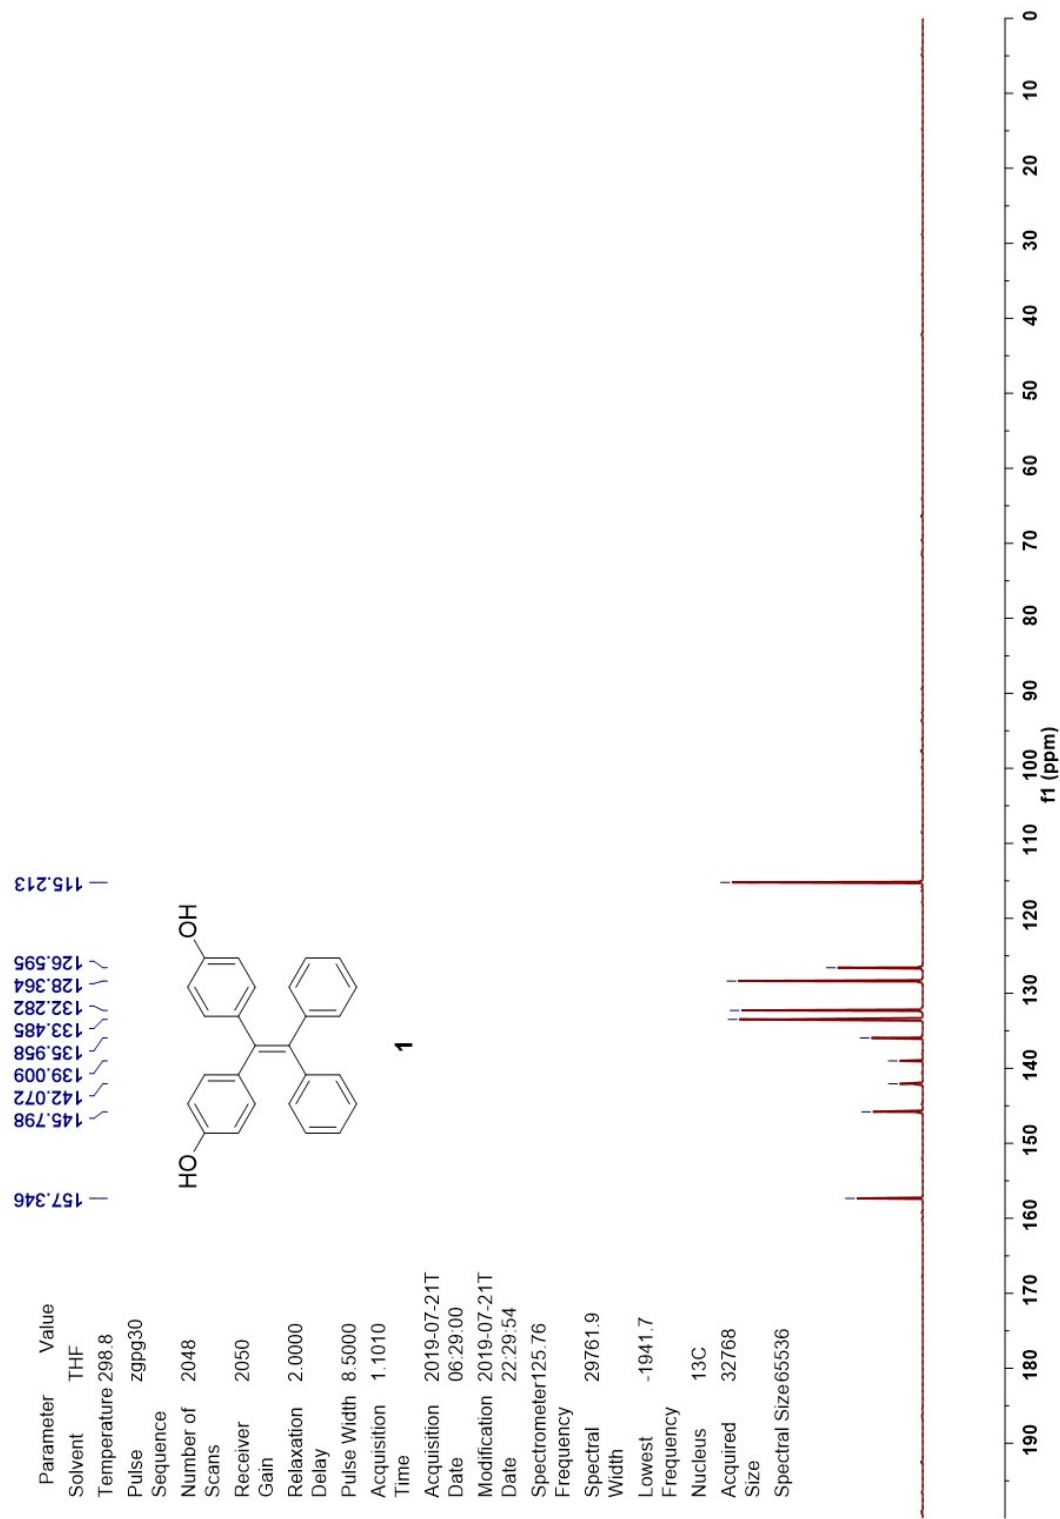

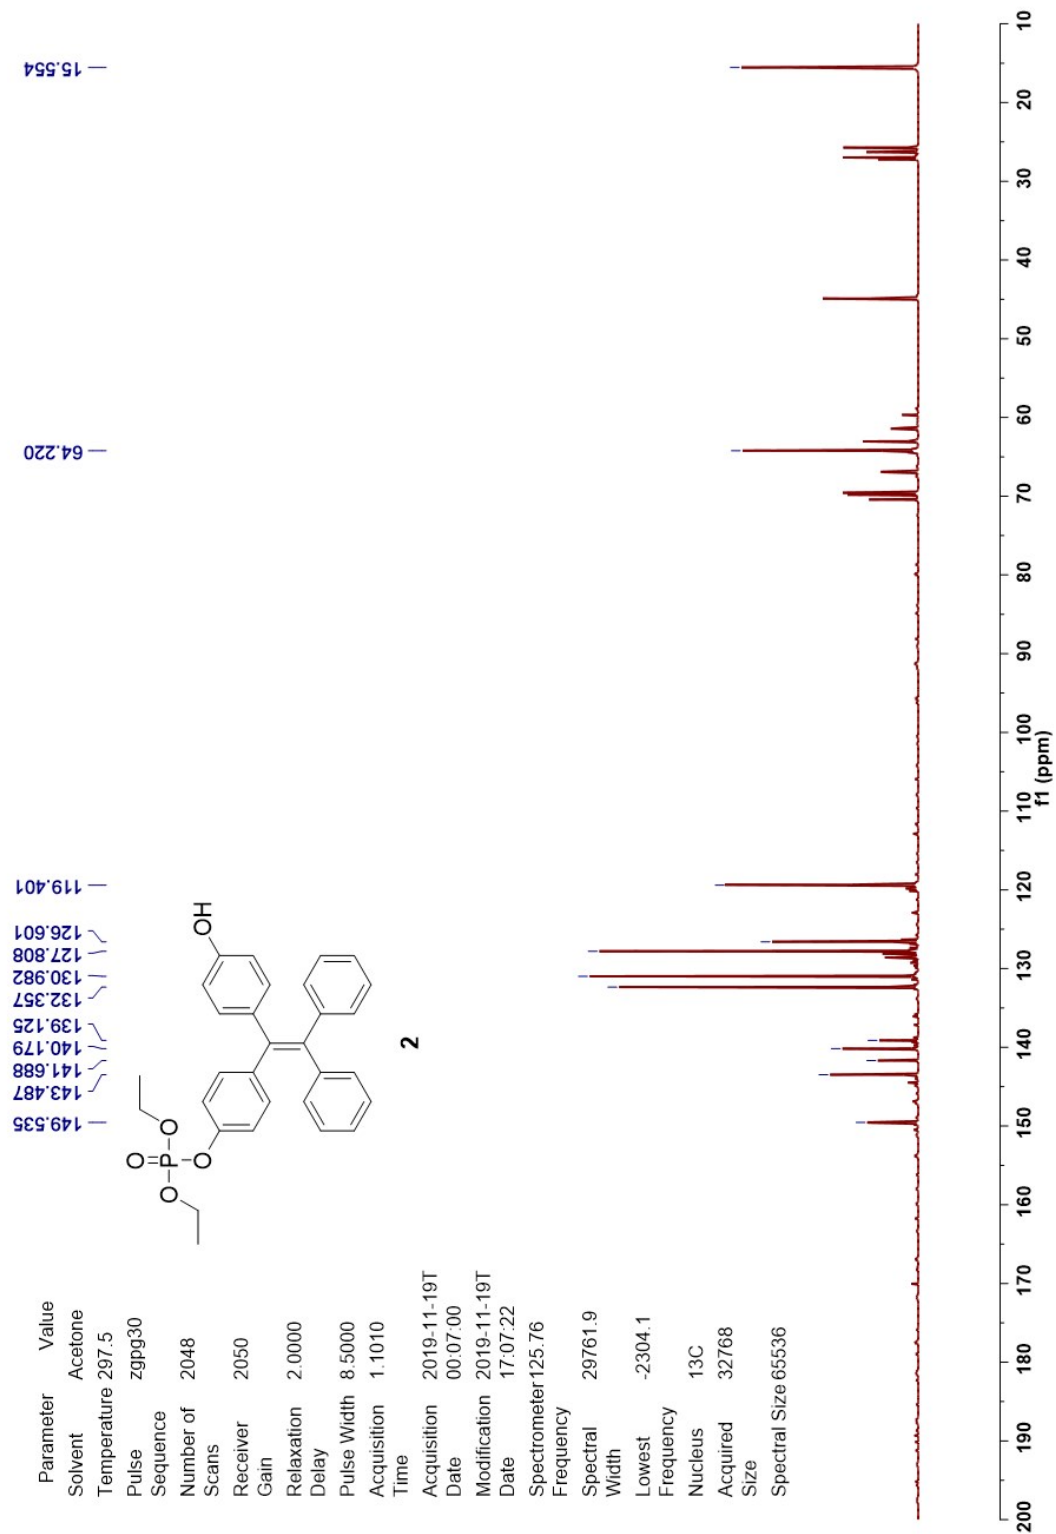

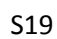

157.049  
144.943  
141.039  
135.614  
133.352  
132.055  
129.477  
128.628  
127.154  
115.517

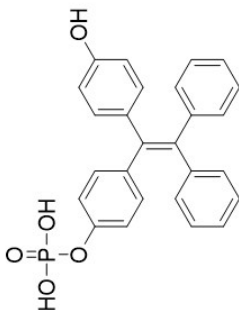

P-TPE

| Parameter              | Value               |
|------------------------|---------------------|
| Solvent                | Acetone             |
| Temperature            | 299.0               |
| Pulse                  | zgpg30              |
| Sequence               |                     |
| Number of Scans        | 2048                |
| Receiver Gain          | 2050                |
| Relaxation Delay       | 2.0000              |
| Pulse Width            | 8.5000              |
| Acquisition Time       | 1.1010              |
| Acquisition Date       | 2020-03-24T09:23:21 |
| Modification Date      | 2020-03-24T09:23:24 |
| Spectrometer Frequency | 125.76              |
| Spectral Width         | 29761.9             |
| Lowest Frequency       | -2183.7             |
| Nucleus                | <sup>13</sup> C     |
| Acquired Size          | 32768               |
| Spectral Size          | 65536               |

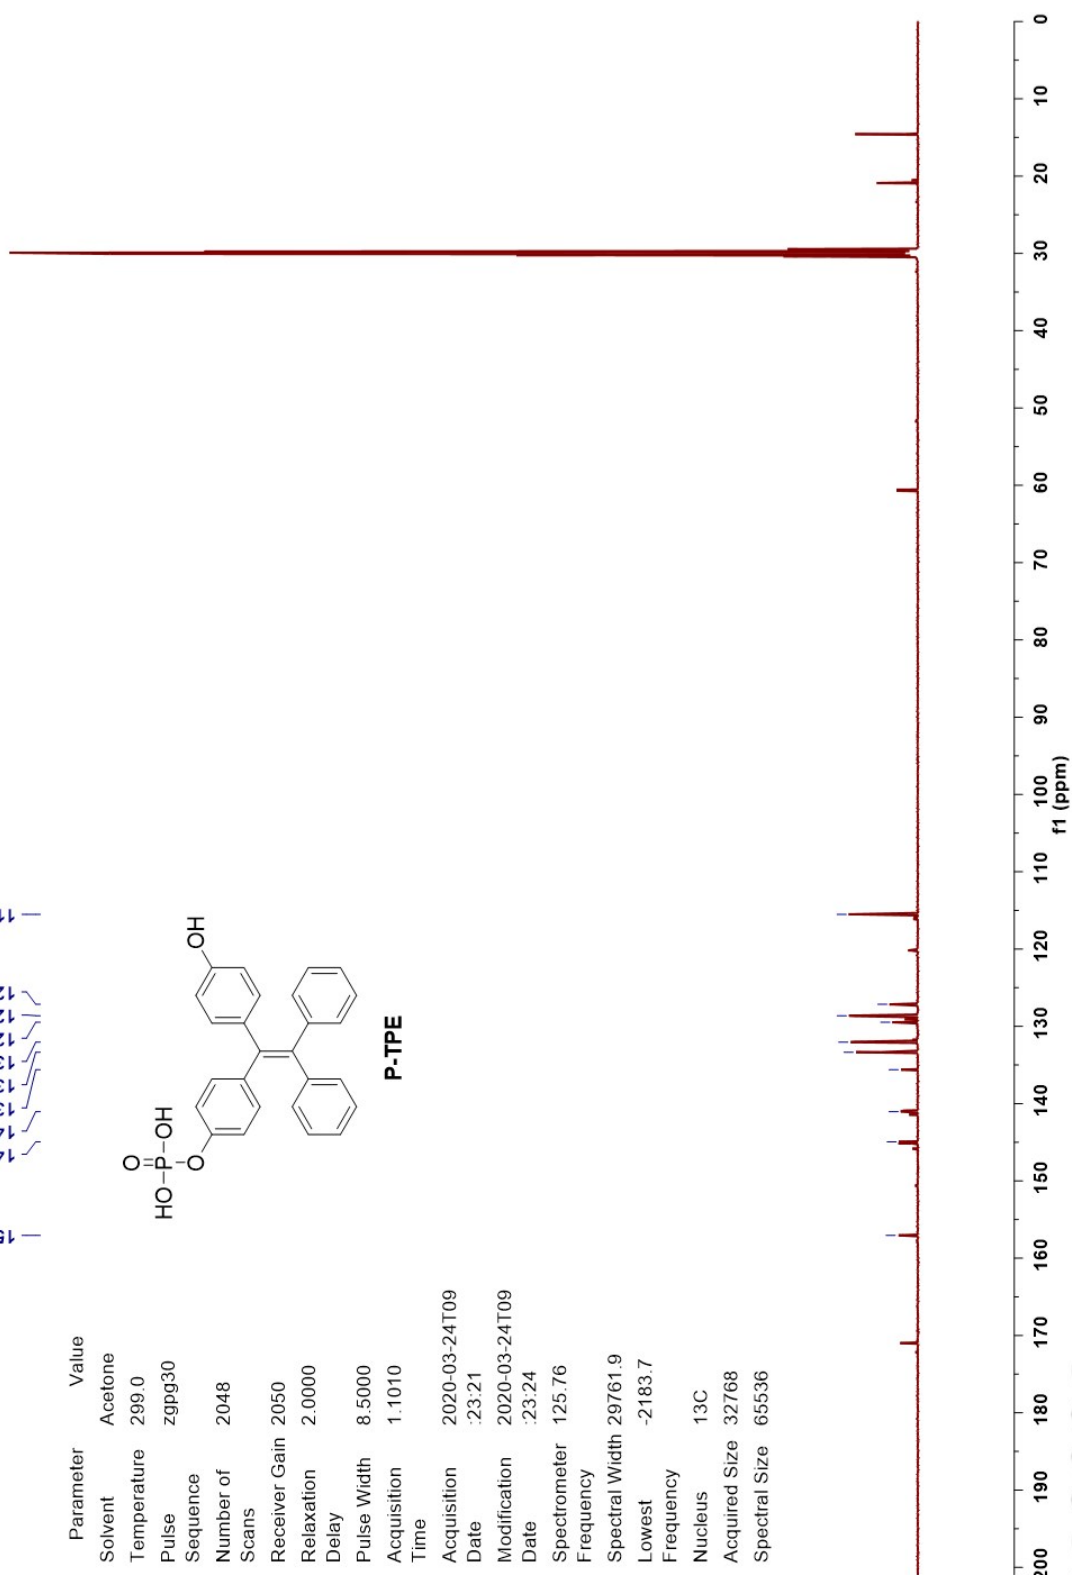



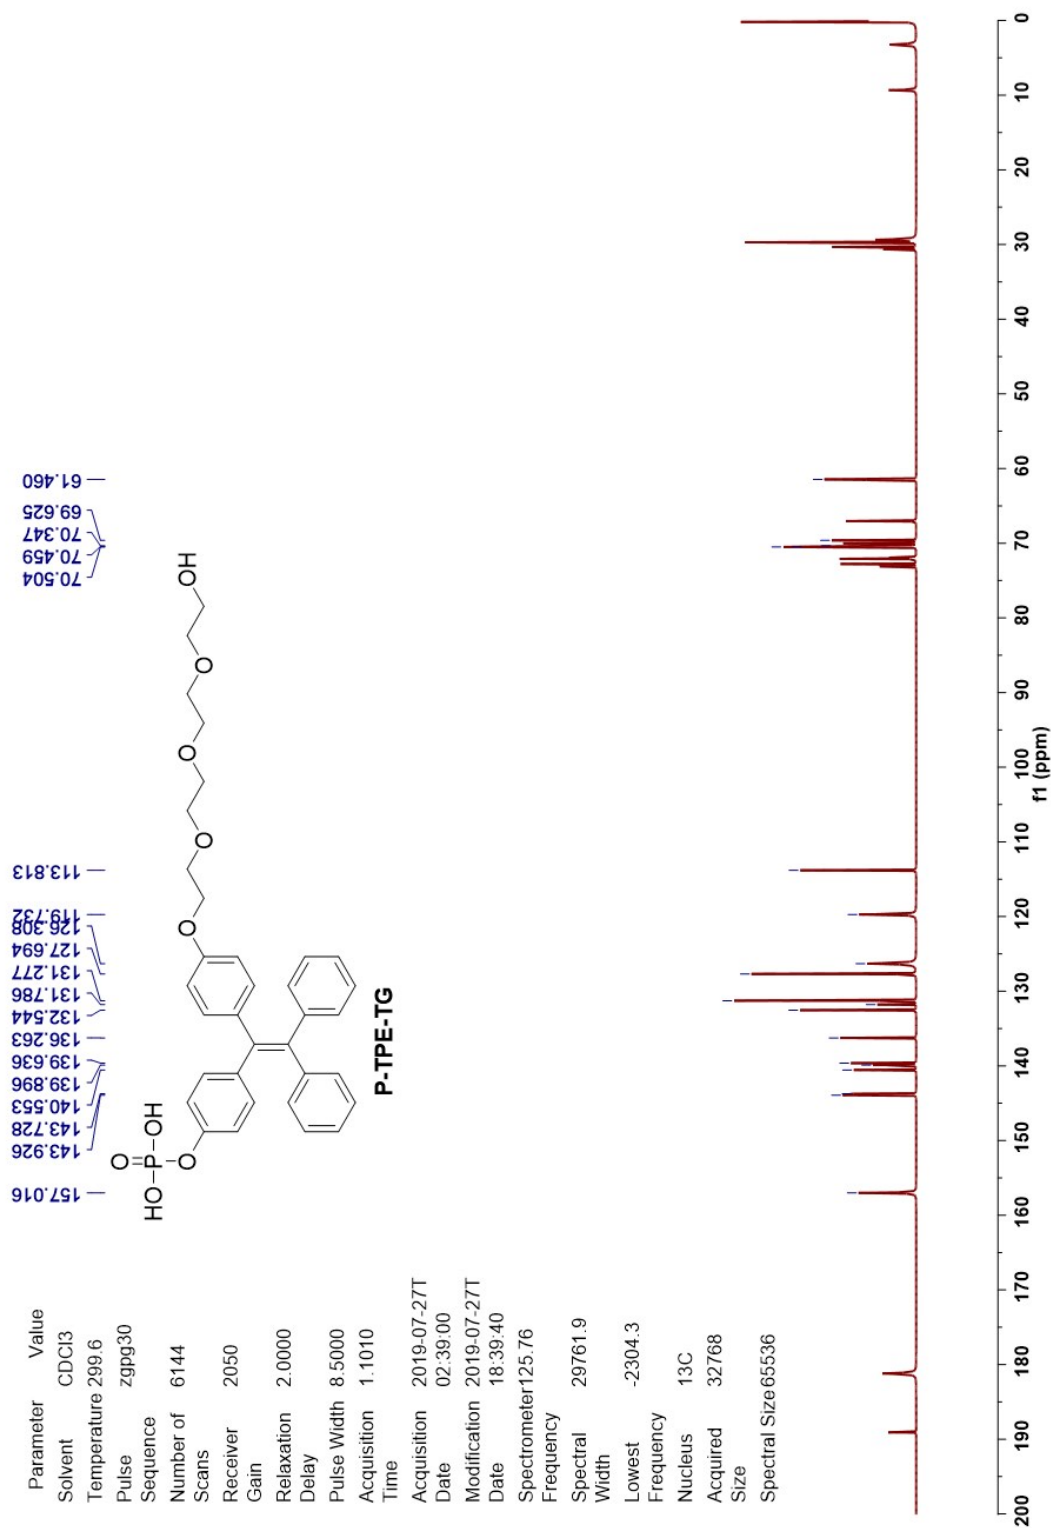

4.259

| Parameter         | Value             |
|-------------------|-------------------|
| Solvent           | CDCl <sub>3</sub> |
| Temperature       | 298.1             |
| Pulse Sequence    | zgpg30            |
| Number of Scans   | 2048              |
| Receiver Gain     | 1820              |
| Relaxation Delay  | 2.0000            |
| Pulse Width       | 10.0000           |
| Acquisition Time  | 0.4020            |
| Acquisition Date  | 2019-07-22T       |
| Acquisition Date  | 14:05:00          |
| Modification Date | 2019-07-23T       |
| Modification Date | 06:05:32          |
| Spectrometer      | 202.46            |
| Frequency         | 81521.7           |
| Spectral Width    | -30637.7          |
| Lowest Frequency  | 31P               |
| Nucleus           | 32768             |
| Acquired Size     | 65536             |

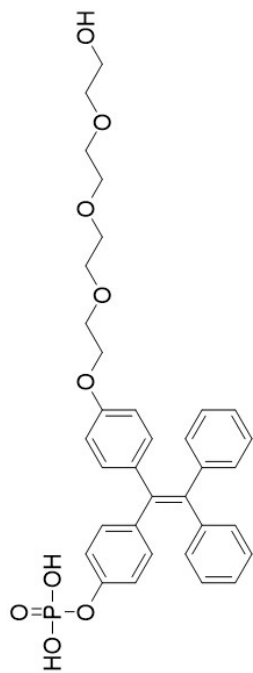

P-TPE-TG

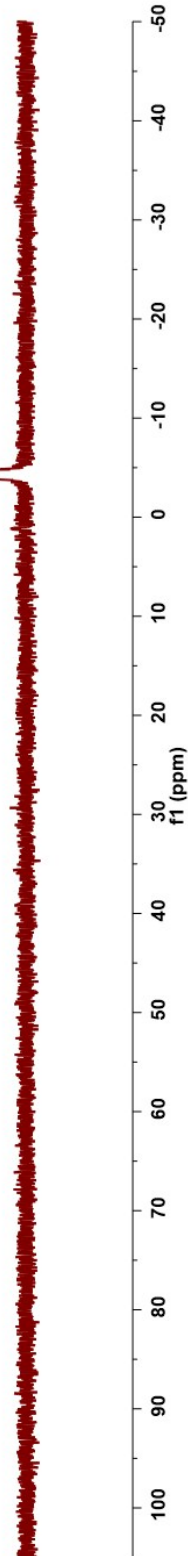

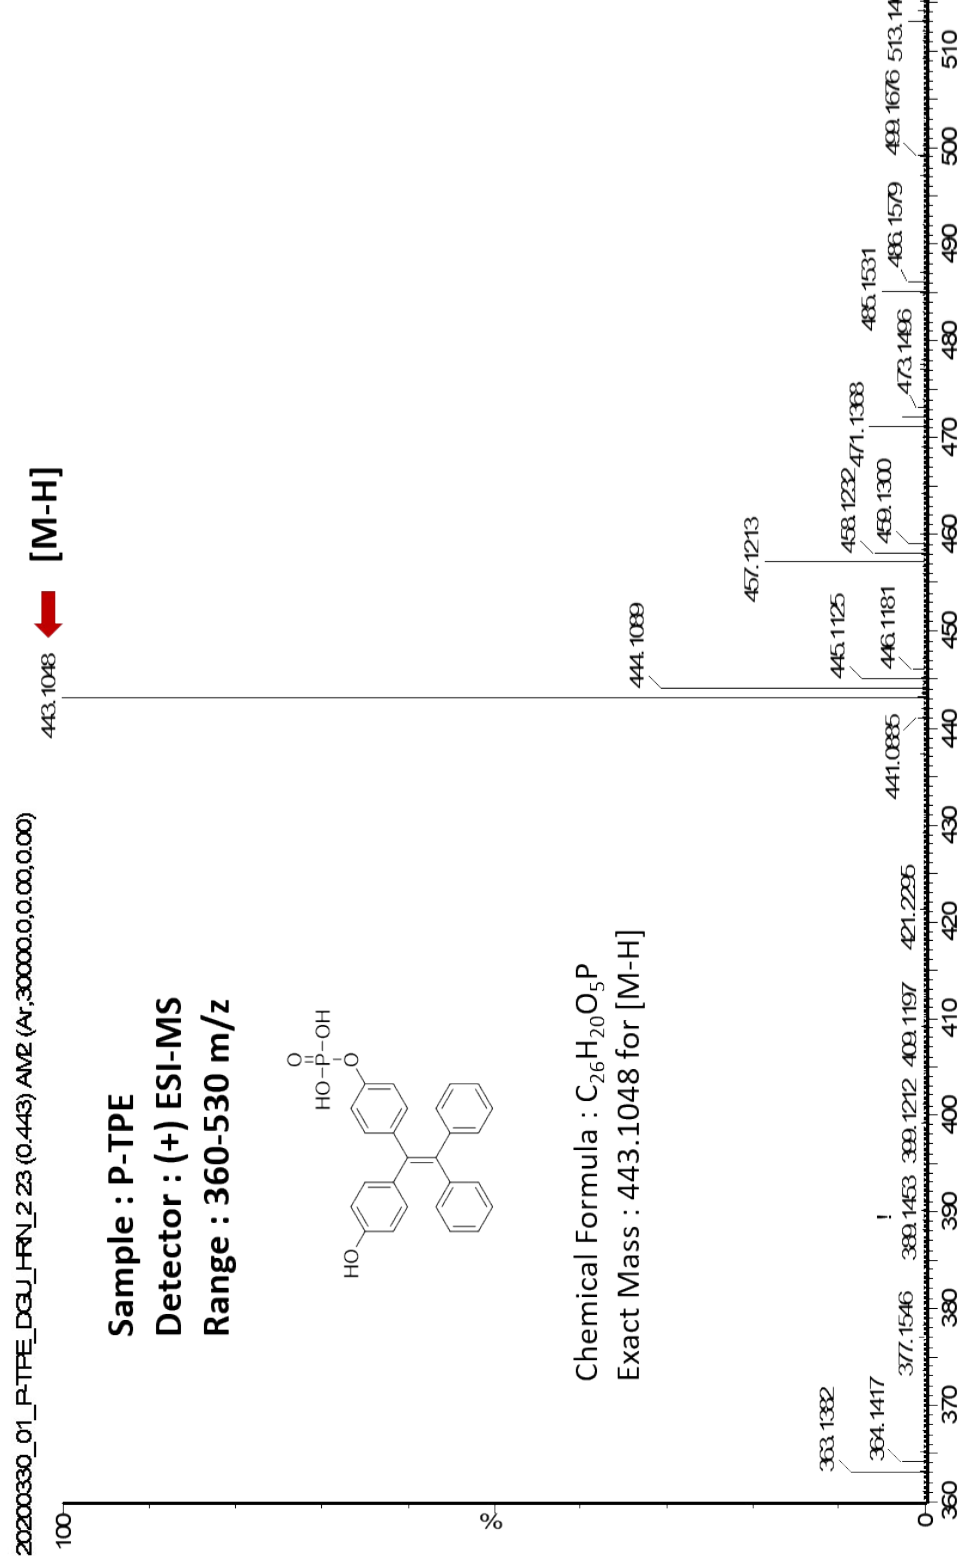

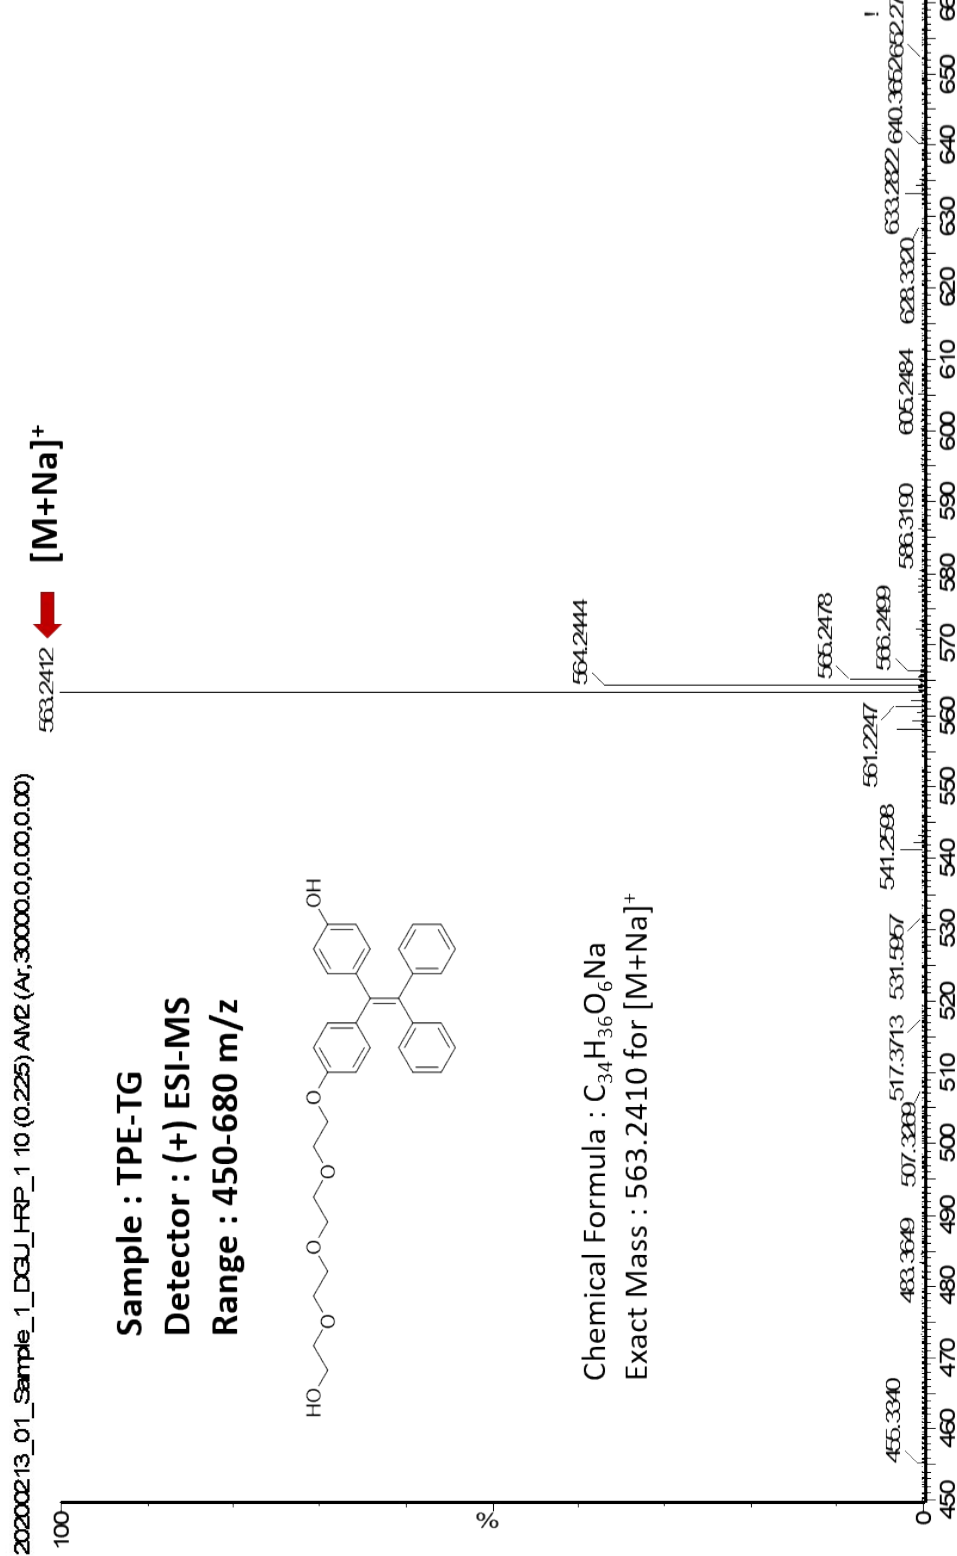

20200213\_02\_Sample\_2\_DCU\_HRP\_2\_13 (0.277) AM2 (Ar, 30000.0,0.00,0.00)  
 100% ↓ **[M+Na]<sup>+</sup>**  
 643.2074

**Sample : P-TPE-TG**  
**Detector : (+) ESI-MS**  
**Range : 550-740 m/z**

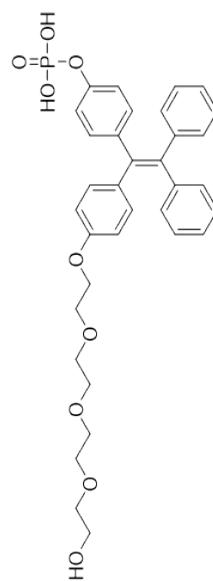

Chemical Formula :  $C_{34}H_{35}O_9NaP$   
 Exact Mass : 643.2073 for  $[M+Na]^+$

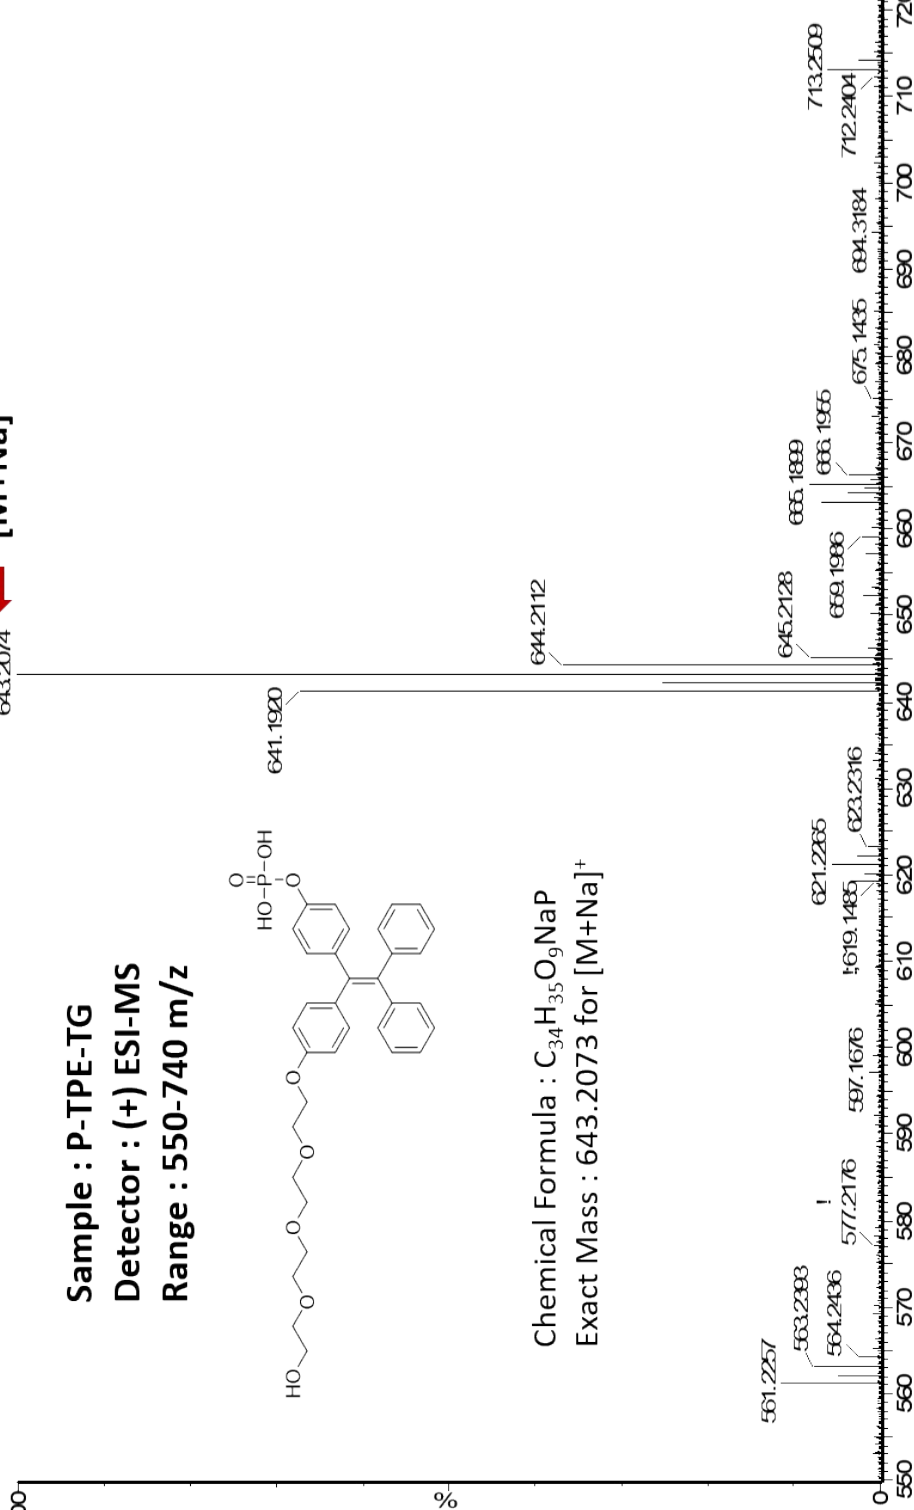

Supplement: d0ra03584j1.pdf [file d0ra03584j1.pdf]
